# Supplementary material for: Regioselective B–H/C–H activation and metal–metal bond formation induced by half-sandwich metals complexes at hydroxy-substitutedo-carboranes
Source: Royal Society of Chemistry journal article supplement (doi:10.1039/c8dt03104e), 2018-01-01
Supplement: c8dt03104e1.pdf [file c8dt03104e1.pdf]

# **Regioselective B-H/C-H Activation and Metal-Metal Bond Formation Induced by Half-Sandwich Metals Complexes at Hydroxy- Substituted o-Carboranes**

Shu-Ting Guo, Peng-Fei Cui, Yang Gao and Guo-Xin Jin\*

Shanghai Key Laboratory of Molecular Catalysis and Innovative Material,  
Collaborative Innovation Center of Chemistry for Energy Materials, Department of  
Chemistry, Fudan University, Shanghai 200433, P. R. China.

\*E-mail: [gxjin@fudan.edu.cn](mailto:gxjin@fudan.edu.cn).

## **Contents**

|                                               |              |
|-----------------------------------------------|--------------|
| <b>1. Experimental details.....</b>           | <b>1-2</b>   |
| <b>2. NMR spectra.....</b>                    | <b>3-8</b>   |
| <b>3. ESI-MS spectra .....</b>                | <b>9-12</b>  |
| <b>4. X-ray crystallography details .....</b> | <b>13-14</b> |
| <b>5. References .....</b>                    | <b>15</b>    |

## Experimental details:

### General Procedures.

All reactions were conducted under an atmosphere of dry, oxygen-free nitrogen using standard Schlenk techniques. The materials  $[\text{Cp}^*\text{MCl}_2]_2$  ( $\text{M} = \text{Ir}$  and  $\text{Rh}$ ),<sup>1</sup> (2-pyridine)(*o*-carboranyl)methanol ligand<sup>2</sup> and *o*-carboranylmethanol<sup>3</sup> were prepared according to literature methods. Nondeuterated solvents were dried and distilled under  $\text{N}_2$  from appropriate drying agents. All other chemicals were purchased from readily available commercial sources and used without further purification.  $^1\text{H}$  NMR spectra and  $^{13}\text{C}$  NMR spectra were recorded on Bruker AVANCE I 400 and AVANCE NEO 400 Spectrometers. Spectra were recorded at room temperature and referenced to the residual protonated solvent for NMR spectra. Proton chemical shift ( $\delta \text{H} = 7.26$  ( $\text{CDCl}_3$ )) and ( $\delta \text{C} = 77.16$  ( $\text{CDCl}_3$ )) are reported relative to the solvent residual peak. Coupling constants are expressed in Hertz.  $^{11}\text{B}$  NMR (160 MHz) spectra were recorded with a Bruker AVANCE III HD spectrometer. Complex multiplets are noted as “m” and broad resonances as “br”. Elemental analyses were performed on an Elementar Vario EL III analyzer. IR spectra (KBr tablets) in the range  $400\text{--}4000\text{ cm}^{-1}$  were measured on a Nicolet AVATAR-360IR spectrometer. Mass spectra were obtained with a Micro TOF II mass spectrometer using electrospray ionization. X-ray diffraction data were collected on a CCD-Bruker SMART APEX system.

## NMR spectra:

Figure S1.  $^1\text{H}$  NMR (400 MHz,  $\text{CDCl}_3$ , ppm) of **3**.

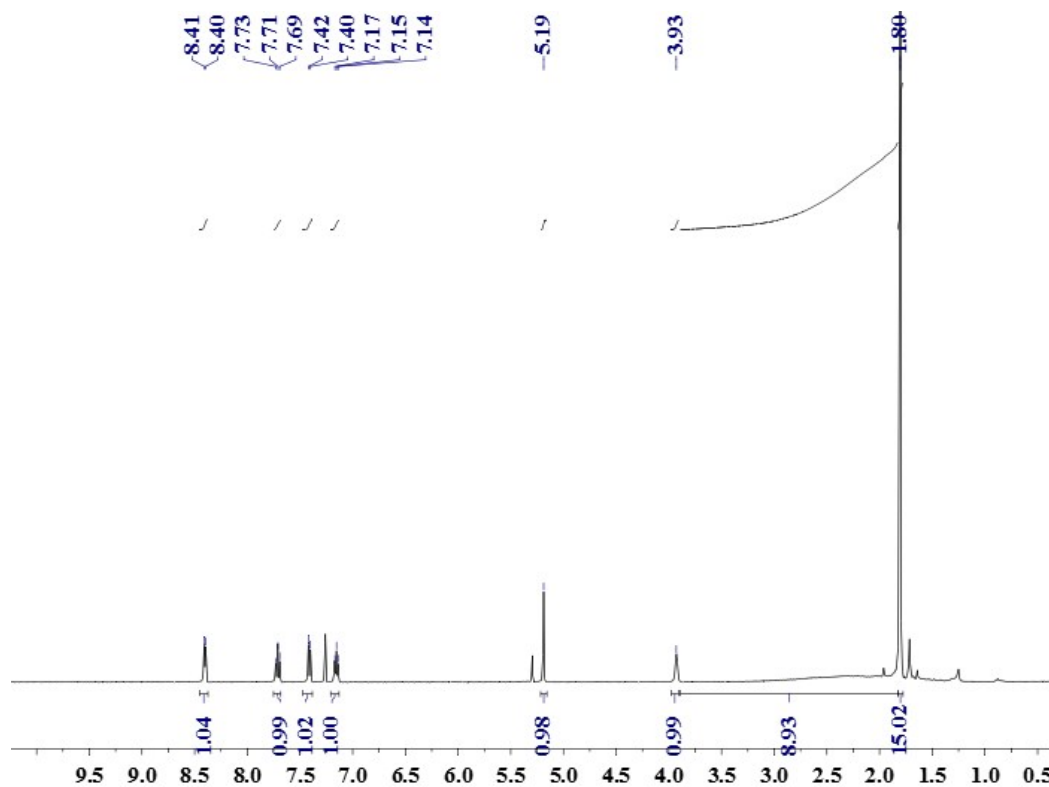

Figure S2.  $^{13}\text{C}$   $\{^1\text{H}\}$  NMR (101 MHz,  $\text{CDCl}_3$ , ppm) of **3**.

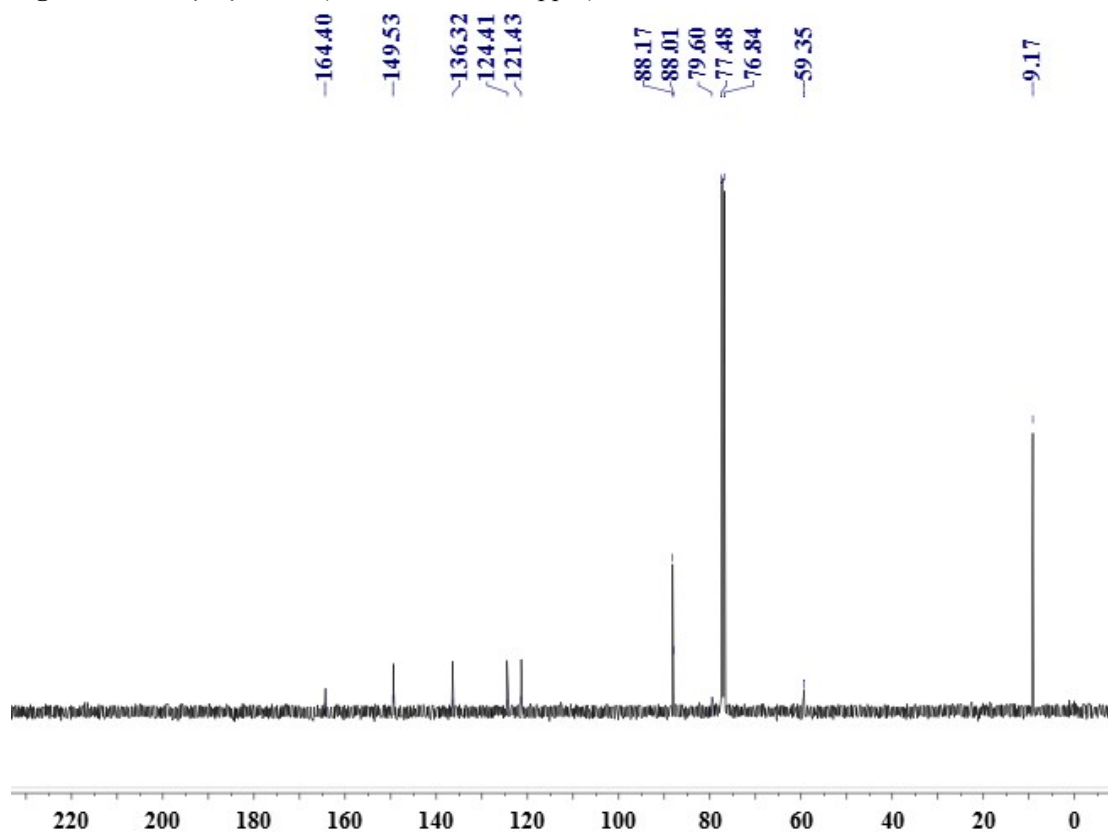

**Figure S3:**  $^{11}\text{B}$  NMR (160 MHz,  $\text{CDCl}_3$ , ppm) of **3**.

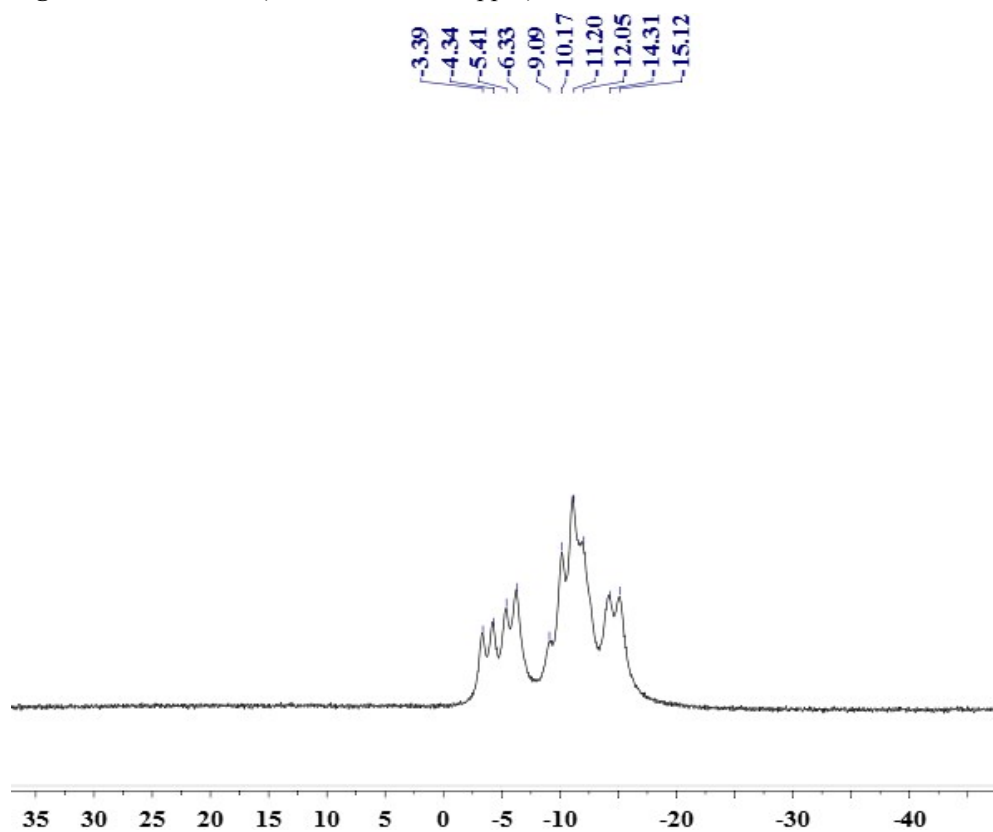

**Figure S4:**  $^1\text{H}$  NMR (400 MHz,  $\text{CDCl}_3$ , ppm) of **4**.

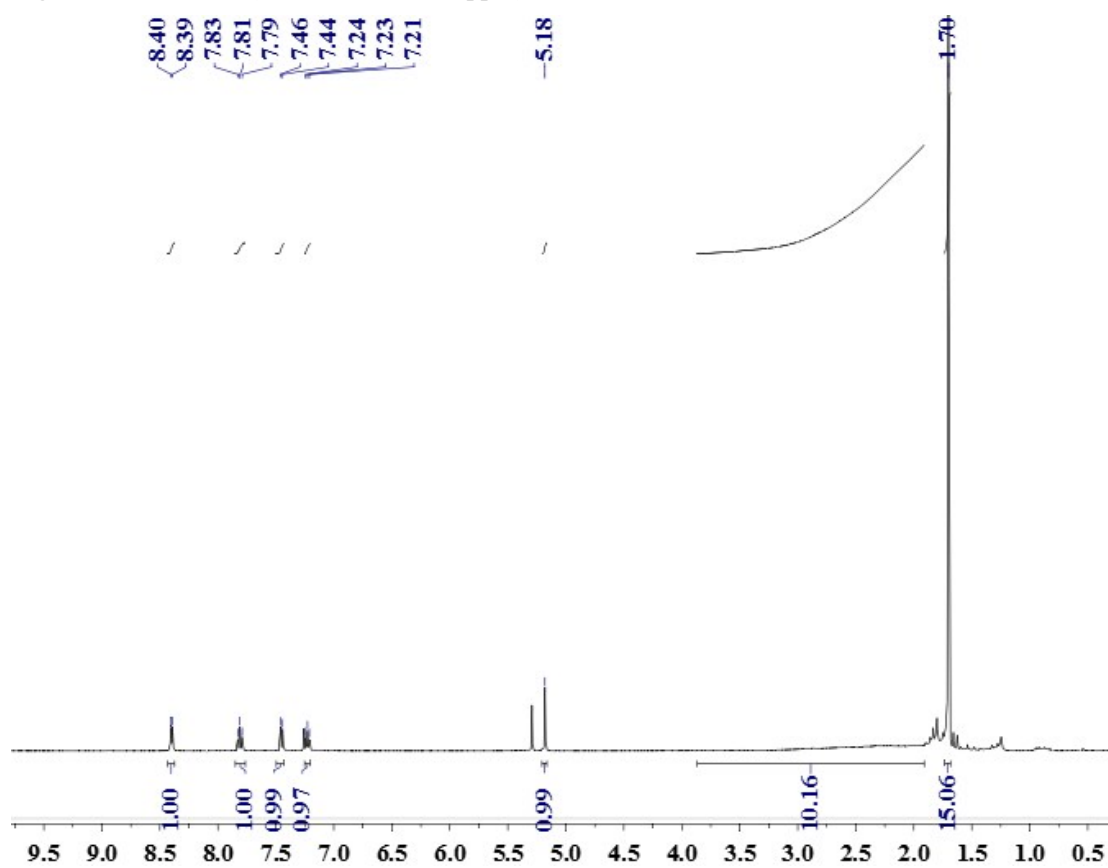

**Figure S5.**  $^{13}\text{C}$   $\{^1\text{H}\}$  NMR (101 MHz,  $\text{CDCl}_3$ , ppm) of **4**.

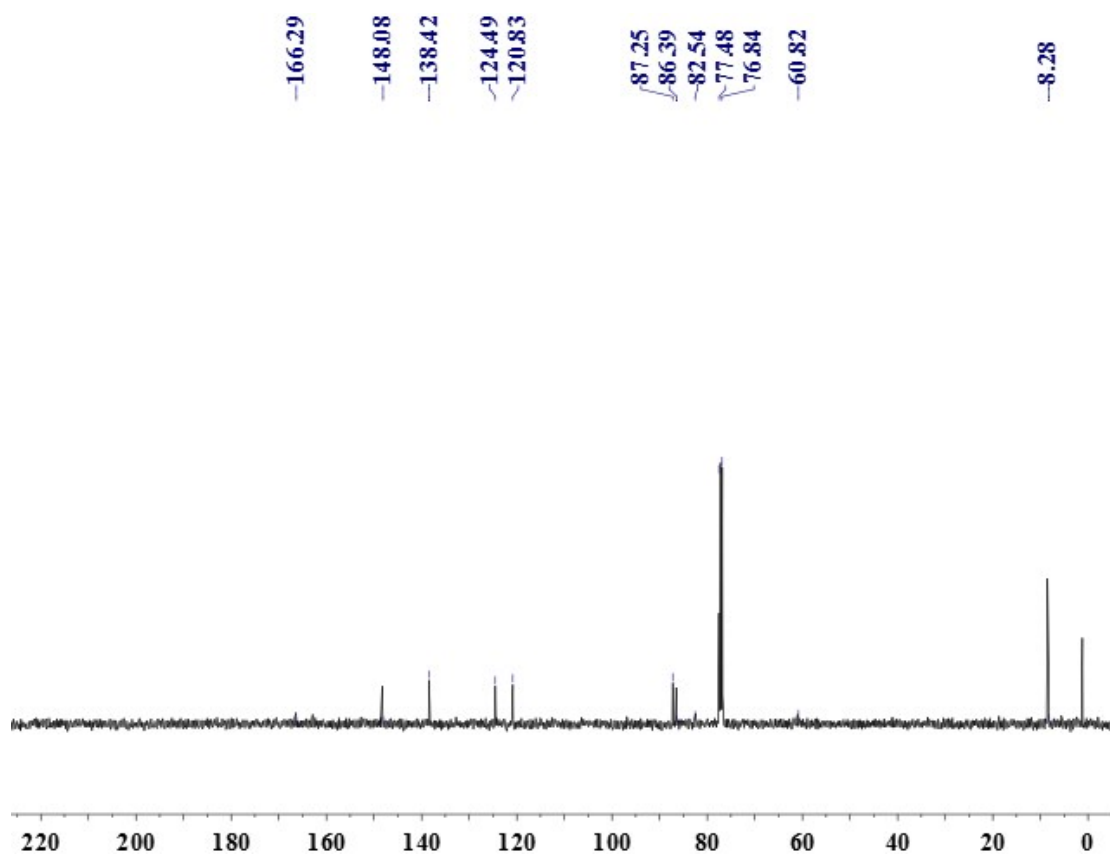

**Figure S6.**  $^{11}\text{B}$  NMR (160 MHz,  $\text{CDCl}_3$ , ppm) of **4**.

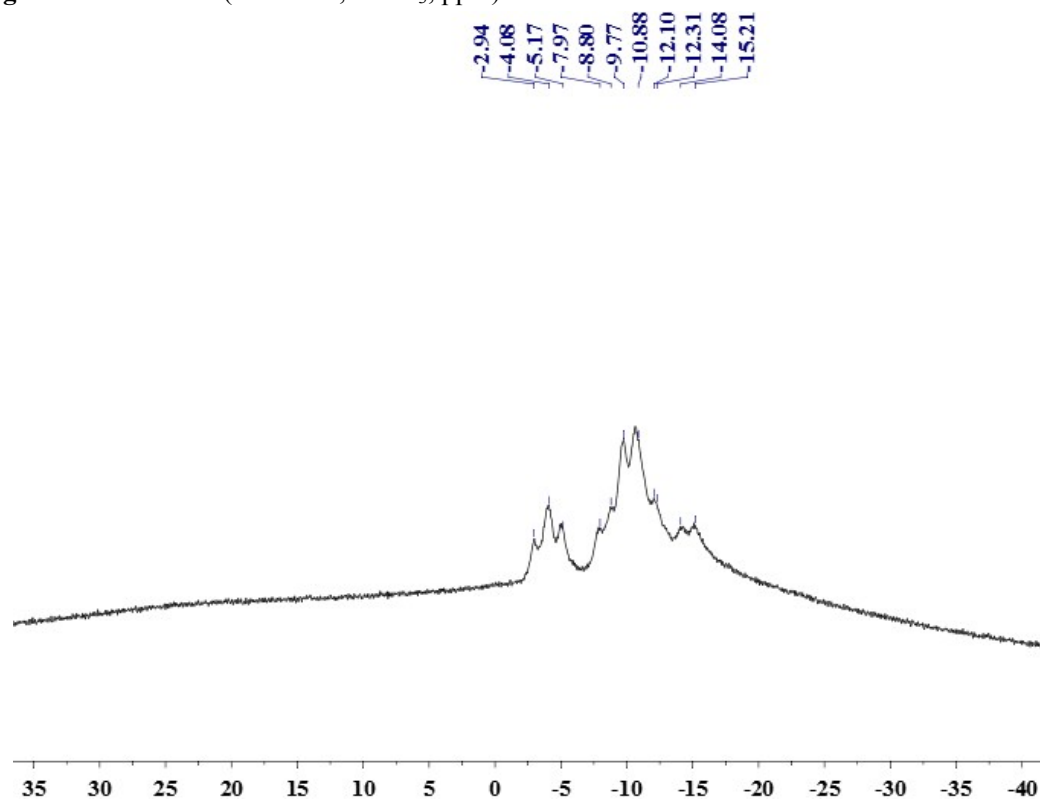

**Figure S7.**  $^1\text{H}$  NMR (400 MHz,  $\text{CDCl}_3$ , ppm) of **5**.

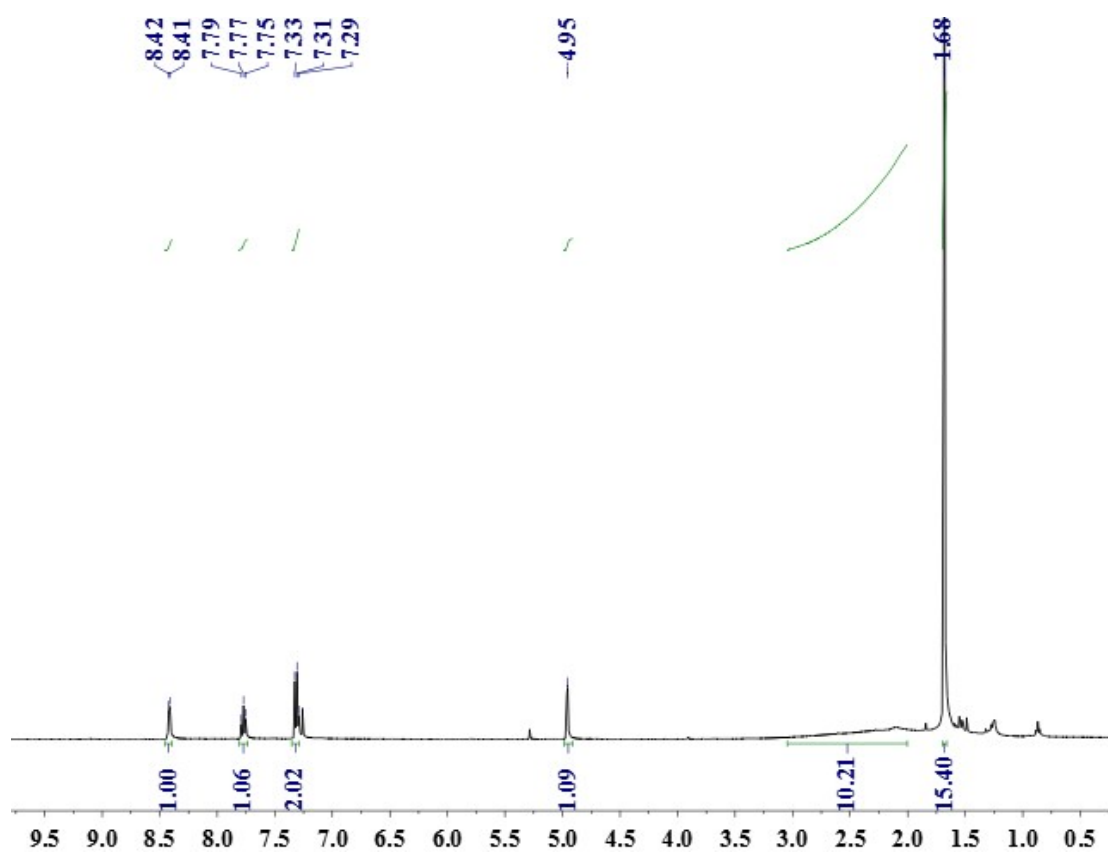

**Figure S8.**  $^{13}\text{C}$   $\{^1\text{H}\}$  NMR (101 MHz,  $\text{CDCl}_3$ , ppm) of **5**.

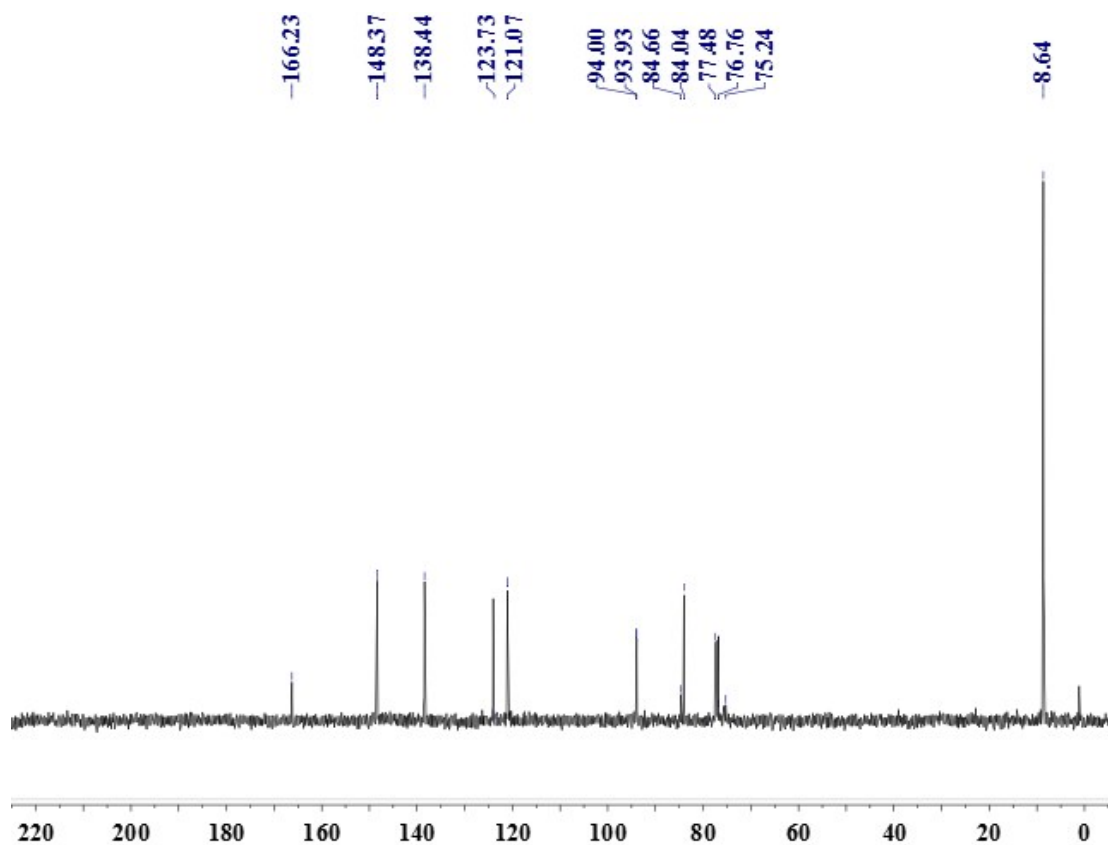

**Figure S9.**  $^{11}\text{B}$  NMR (160 MHz,  $\text{CDCl}_3$ , ppm) of **5**.

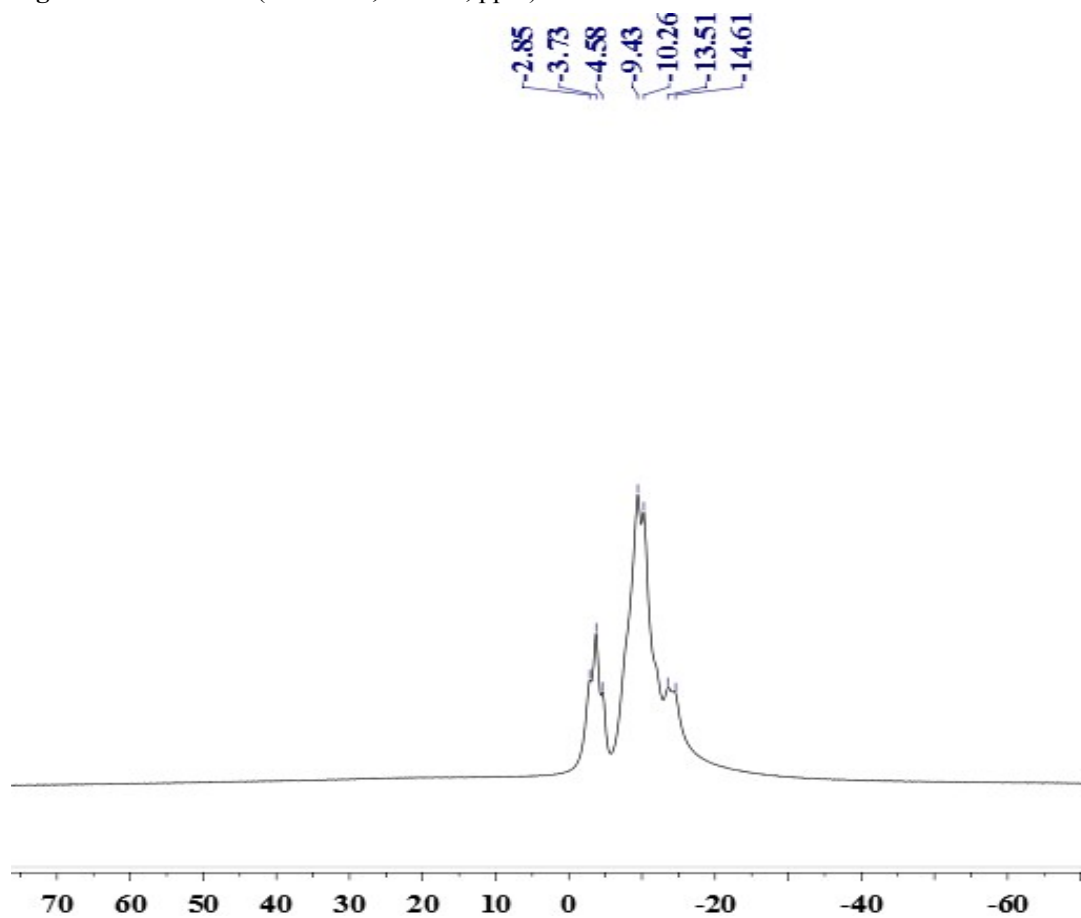

**Figure S10.**  $^1\text{H}$  NMR (400 MHz,  $\text{CDCl}_3$ , ppm) of **6**.

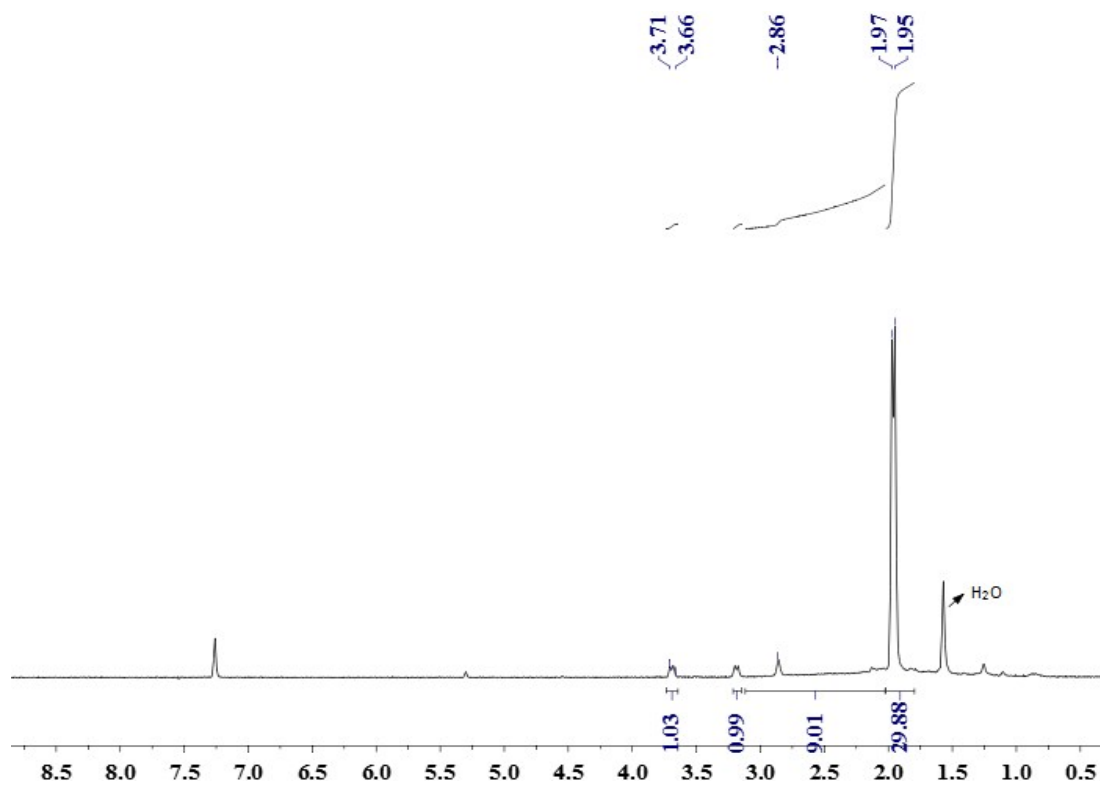

**Figure S11.**  $^{13}\text{C}$   $\{^1\text{H}\}$  NMR (101 MHz,  $\text{CDCl}_3$ , ppm) of **6**.

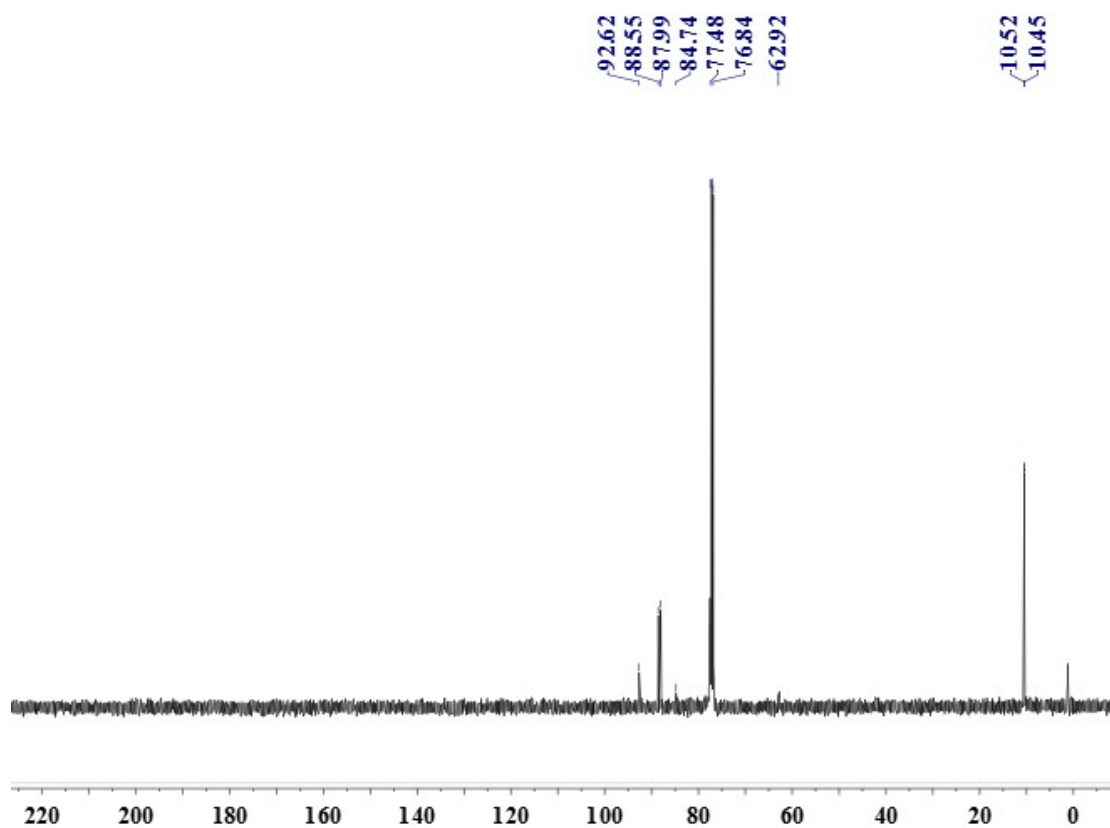

**Figure S12.**  $^{11}\text{B}$  NMR (160 MHz,  $\text{CDCl}_3$ , ppm) of **6**.

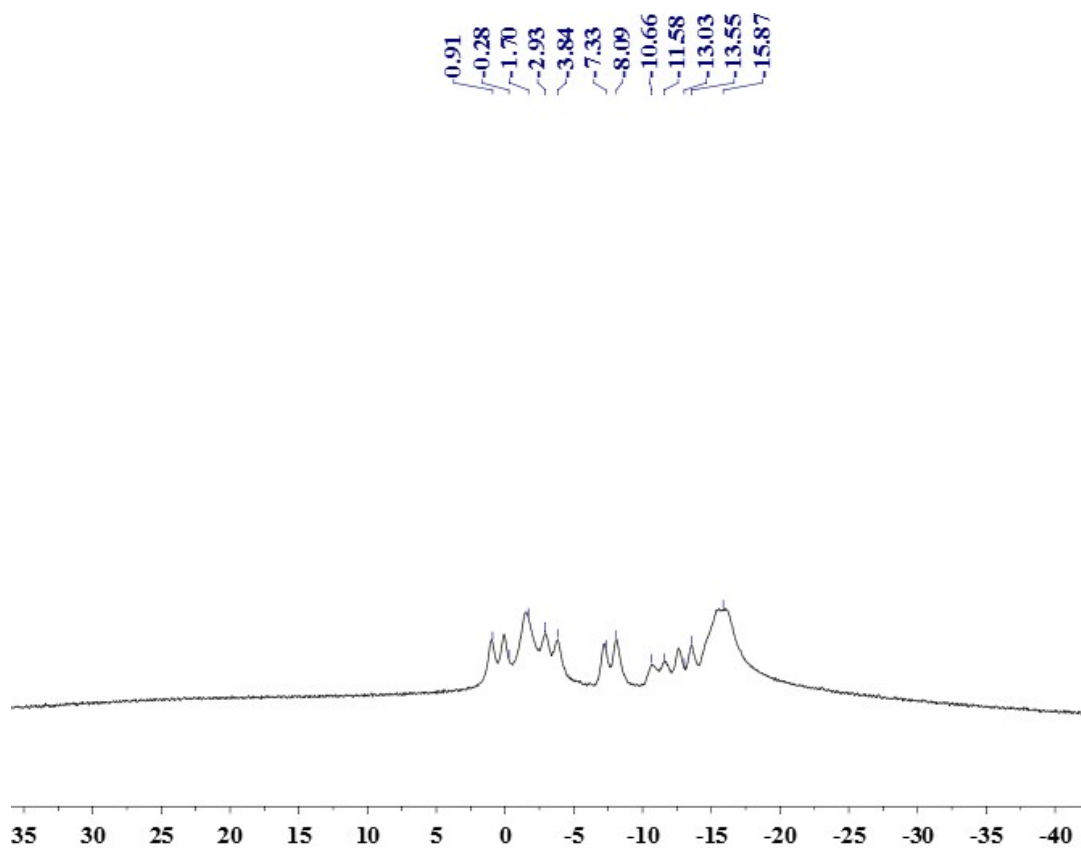

## ESI-MS spectra:

**Figure S13.** Experimental (top) and theoretical (bottom) ESI-MS spectra of complex **3**

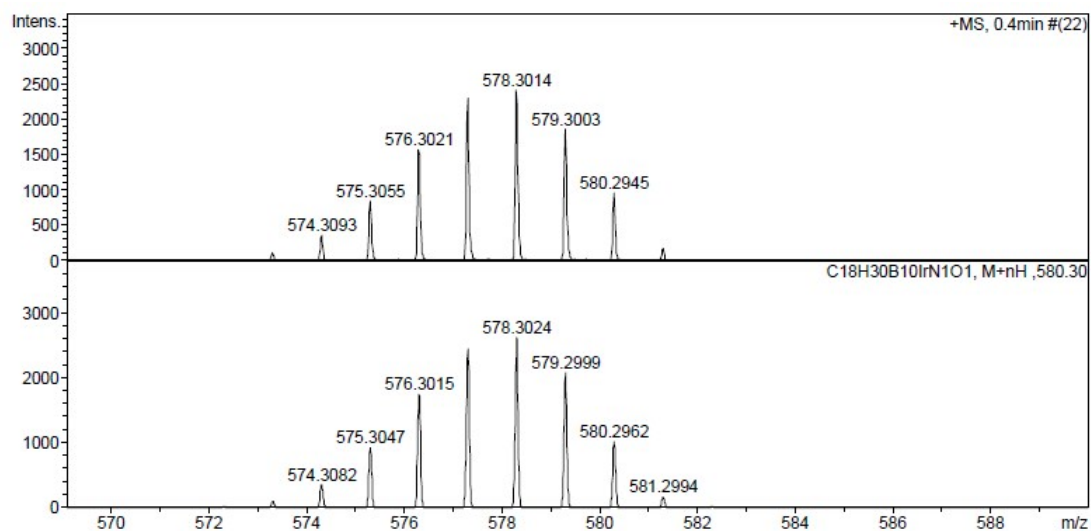

**Figure S14.** Experimental (top) and theoretical (bottom) ESI-MS spectra of complex **4**

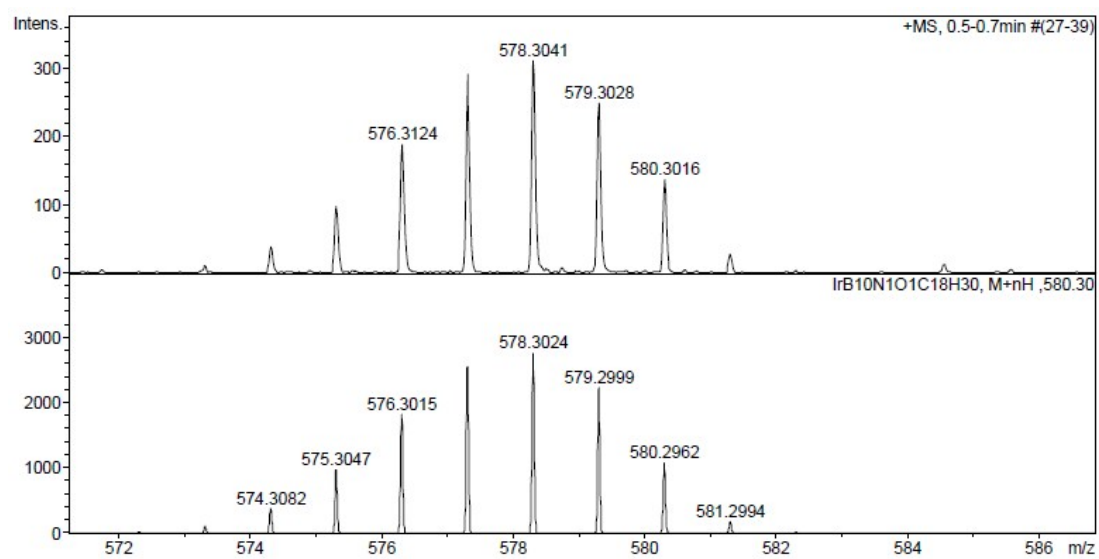

**Figure S15.** Experimental (top) and theoretical (bottom) ESI-MS spectra of complex **5**

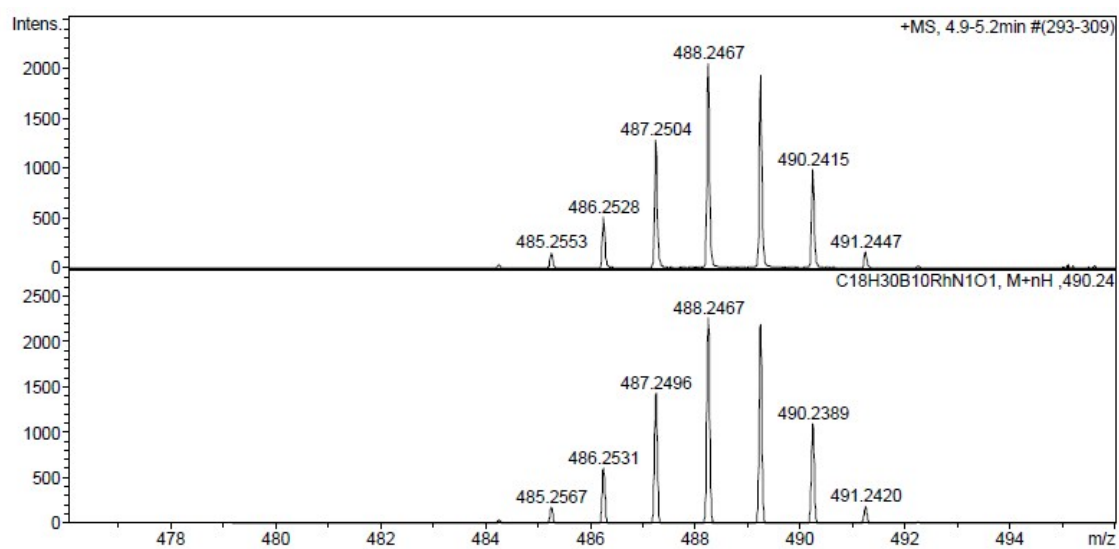

**Figure S16.** Experimental (top) and theoretical (bottom) ESI-MS spectra of complex **6**.

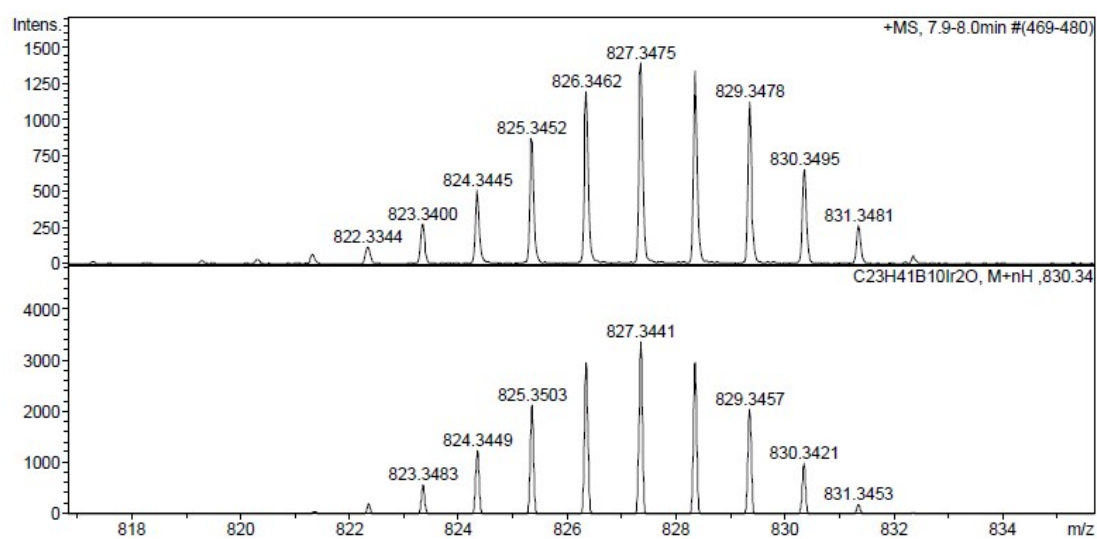

## X-ray crystallography details:

Single crystals of **3**, **4**, **5** and **6** suitable for X-ray diffraction study were obtained at low temperature. X-ray intensity data of **3**, **4**, **5** and **6** were collected on a CCD-Bruker SMART APEX system.

**Table S1.** Crystal data for complexes **3**, **4**, **5** and **6**.

| complex                           | 3                                            | 4                                                 | 5                                            | 6                                                 |
|-----------------------------------|----------------------------------------------|---------------------------------------------------|----------------------------------------------|---------------------------------------------------|
| Empirical formula                 | C18 H30 B10 Ir N O                           | C18 H32 B10 Ir N O2                               | C18 H32 B10 N O2 Rh                          | C23 H41 B10 Ir2 O                                 |
| Formula weight                    | 576.73                                       | 594.74                                            | 505.45                                       | 826.06                                            |
| Temperature                       | 173(2) K                                     | 203(2) K                                          | 173(2) K                                     | 203(2) K                                          |
| Wavelength                        | 1.34138 Å                                    | 0.71073 Å                                         | 1.34138 Å                                    | 0.71073 Å                                         |
| Crystal system                    | Monoclinic                                   | Monoclinic                                        | Monoclinic                                   | Orthorhombic                                      |
| Space group                       | P2 <sub>1</sub> /n                           | P2 <sub>1</sub> /c                                | P2 <sub>1</sub> /c                           | P2 <sub>1</sub> 2 <sub>1</sub> 2 <sub>1</sub>     |
| a                                 | 10.6487(3) Å                                 | a = 8.7460(19) Å                                  | a = 8.7191(4) Å                              | a = 11.509(4) Å                                   |
| b                                 | 21.3310(6) Å                                 | b = 18.478(4) Å                                   | b = 18.3682(7) Å                             | b = 13.941(4) Å                                   |
| c                                 | 11.2665(3) Å                                 | c = 14.961(3) Å                                   | c = 14.9487(6) Å                             | c = 18.125(6) Å                                   |
| $\alpha$                          | 90°                                          | a = 90°.                                          | 90°                                          | a = 90°.                                          |
| $\beta$                           | 116.9850(10)°                                | b = 99.519(3)°.                                   | 99.5160(10)°.                                | b = 90°.                                          |
| $\gamma$                          | 90°                                          | g = 90°.                                          | 90°                                          | g = 90°.                                          |
| Volume                            | 2280.53(11) Å <sup>3</sup>                   | 2384.5(9) Å <sup>3</sup>                          | 2361.15(17) Å <sup>3</sup>                   | 2907.9(16) Å <sup>3</sup>                         |
| Z                                 | 4                                            | 4                                                 | 4                                            | 4                                                 |
| Density (calculated)              | 1.680 Mg/m <sup>3</sup>                      | 1.657 Mg/m <sup>3</sup>                           | 1.422 Mg/m <sup>3</sup>                      | 1.887 Mg/m <sup>3</sup>                           |
| Absorption coefficient            | 7.554 mm <sup>-1</sup>                       | 5.616 mm <sup>-1</sup>                            | 4.025 mm <sup>-1</sup>                       | 9.160 mm <sup>-1</sup>                            |
| F(000)                            | 1120                                         | 1160                                              | 1032                                         | 1564                                              |
| Crystal size (mm <sup>3</sup> )   | 0.670 x 0.160 x 0.160                        | 0.250 x 0.220 x 0.180 mm <sup>3</sup>             | 0.630 x 0.240 x 0.210                        | 0.350 x 0.210 x 0.120 mm <sup>3</sup>             |
| Theta range for data collection   | 4.234 to 58.153°.                            | 1.766 to 28.500°.                                 | 3.344 to 59.280°.                            | 1.843 to 27.677°.                                 |
| Index ranges                      | -13 ≤ h ≤ 13,<br>24 ≤ k ≤ 27,<br>14 ≤ l ≤ 14 | - 11 ≤ h ≤ 11, -<br>24 ≤ k ≤ 21, -<br>20 ≤ l ≤ 19 | -11 ≤ h ≤ 11,<br>23 ≤ k ≤ 19,<br>19 ≤ l ≤ 19 | - 14 ≤ h ≤ 14, -<br>18 ≤ k ≤ 11, -<br>23 ≤ l ≤ 23 |
| Reflections collected             | 20599                                        | 18145                                             | 20049                                        | 20797                                             |
| Independent reflections           | 4841 [R(int) = 0.0520]                       | 6018 [R(int) = 0.0589]                            | 5187 [R(int) = 0.0501]                       | 6736 [R(int) = 0.0466]                            |
| Data / restraints / parameters    | 4841 / 0 / 289                               | 6018 / 12 / 304                                   | 5187 / 12 / 304                              | 0.647 and 0.261                                   |
| Goodness-of-fit on F <sup>2</sup> | 1.080                                        | 1.043                                             | 1.102                                        | 6736 / 42 / 335                                   |

|                      |   |         |                    |                    |                    |                    |
|----------------------|---|---------|--------------------|--------------------|--------------------|--------------------|
| Final                | R | indices | R1 = 0.0338, wR2 = | R1 = 0.0358, wR2 = | R1 = 0.0352, wR2 = | 1.100              |
| [I>2sigma(I)]        |   |         | 0.0809             | 0.0921             | 0.0896             |                    |
| R indices (all data) |   |         | R1 = 0.0353, wR2 = | R1 = 0.0456, wR2 = | R1 = 0.0385, wR2 = | R1 = 0.0448, wR2 = |
|                      |   |         | 0.0819             | 0.0979             | 0.0921             | 0.1325             |

---

$\alpha$ :  $R_1 = \Sigma ||F_o| - |F_c|| / \Sigma |F_o|$  (based on reflections with  $F_o^2 > 2\sigma F^2$ ).  $wR_2 = [\Sigma [w(F_o^2 - F_c^2)^2] / \Sigma [w(F_o^2)^2]]^{1/2}$ ;  
 $w = 1 / [\sigma^2(F_o^2) + (0.095P)^2]$ ;  $P = [\max(F_o^2, 0) + 2F_c^2] / 3(F_o^2 > 2\sigma F^2)$ .

## Reference:

1. C. White, A. Yates and P. M. Maitlis, *Inorg. Synth.*, 1992, **29**, 228.
2. F. D. Salvo, B. Camargo, Y. García, F. Teixidor, C. Viñas, J. G. Planas, M. E. Light and M. B. Hursthouse, *Crystengcomm*, 2011, **13**, 5788-5806.
3. F. A. Gomez, S. E. Johnson and M. F. Hawthorne, *J. Am. Chem. Soc.*, 1991, **113**, 5913-5914.
